# Supplementary material
Source: HighWire-hosted journal article supplement (https://bjo.bmj.com/content/suppl/2005/11/22/89.12.1120)
Supplement: 89121120.pdf [file 89121120.pdf]

**Table 1** Characteristics of the study and control groups

|                           | Sex (no of females)<br>(mean) | Age (years)<br>(mean (SD)) | Distance deviation<br>(prism dioptres)<br>(mean (SD)) | Near deviation<br>(prism dioptres)<br>(mean (SD)) |
|---------------------------|-------------------------------|----------------------------|-------------------------------------------------------|---------------------------------------------------|
| Study group<br>(n = 29)   | 13                            | 6.7 (8.3)<br>range 3–17    | 19 (10)<br>range 0–40                                 | 35 (11)<br>range 10–55                            |
| Control group<br>(n = 37) | 17                            | 4.4 (9.0)<br>range 3–14    | 30 (11)<br>range 14–60                                | 13 (11)<br>range 0–45                             |
| p Value                   | 0.87                          | 0.24                       |                                                       |                                                   |
